# Supplementary material for: Ferroelectric transitions in silver niobate ceramics
Source: Royal Society of Chemistry journal article supplement (doi:10.1039/c8tc05451g), 2018-12-11
Supplement: c8tc05451g1.pdf [file c8tc05451g1.pdf]

## Ferroelectric Transitions in Silver Niobate Ceramics

Ye Tian<sup>1</sup>, Jing Li<sup>1</sup>, Qingyuan Hu<sup>1</sup>, Li Jin<sup>1\*</sup>, Kun Yu<sup>1</sup>, Jinglei Li<sup>1</sup>, E.D. Politova<sup>2</sup>, S.Yu. Stefanovich<sup>2,3</sup>, Zhuo Xu<sup>1</sup>, Xiaoyong Wei<sup>1\*</sup>

<sup>1</sup>*Electronic Materials Research Laboratory, Key Laboratory of the Ministry of Education & International Center for Dielectric Research, School of Electronic and Information Engineering, Xi'an Jiaotong University, Xian 710049, China*

<sup>2</sup>*L. Ya. Karpov Institute of Physical Chemistry, Moscow, Russia*

<sup>3</sup>*Lomonosov Moscow State University, Leninskie gory, 1, Moscow, 119992, Russia*

\*Email - wdy@mail.xjtu.edu.cn

AgNbO<sub>3</sub> ceramic samples were prepared using conventional solid-state reaction methods with sintering under flowing oxygen. Stoichiometric amounts of Ag<sub>2</sub>O (99.7%,) and Nb<sub>2</sub>O<sub>5</sub> (99.99%, Sinopharm Chemical Reagent, China) powders were ball-milled in ethanol for 12 h using a planetary ball mill (QM-3SP4, Nanjing University Instrument, China). After drying, the mixtures were calcined at 850 °C for 6 h, using a pipe furnace (GLS-1700X, Hefei Kejing, China), in flowing oxygen at a rate of 500mL/min. The calcined powders were milled in ethanol for 4 h and after drying, the powders were mixed with 5 wt% polyvinyl alcohol (PVA) solution and then pressed into pellets with a diameter of 10 mm and *ca.* 1 mm thickness under 200 MPa

uniaxial pressure. The pellets were heated at a rate of 5 °C/min to 600 °C and held at this temperature for 2 h to burn off the PVA. The samples were subsequently sintered from 1000 to 1140 °C in oxygen at a flow rate of 500mL/min for 6 h, followed by cooling to 500°C at a rate 5 °C/min. After that, the samples were cooled down to ambient temperature followed by furnace. The ceramic with highest relative density ~97%(Archimedes method) was obtained at the sintered temperature of 1090°C [see Fig.S1]. The backscatter electron image and EDS elements mapping of the 1090°C sintered ceramic surface clearly reveals that the ceramic shows uniform chemical distribution and no impurity or second phase can be found, indicating that the ceramic is single phase. But after thermal etching at 975°C in air, the Ag deficient could be found in some area. The ceramic surface was observed by scanning electron microscopy (SEM, Quanta FEG 250, FEI, Hillsboro, USA), equipped with backscatter electron detector and Electronic differential system (EDS).

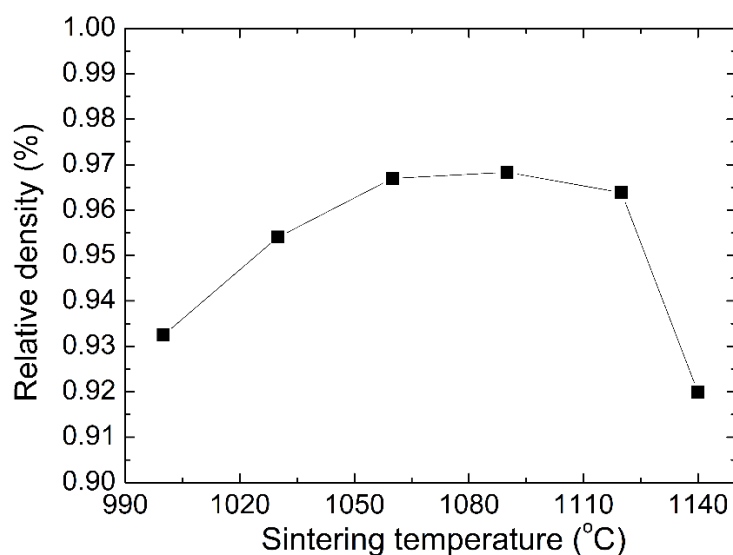

Fig.S1 Relative density vs. sintering temperature

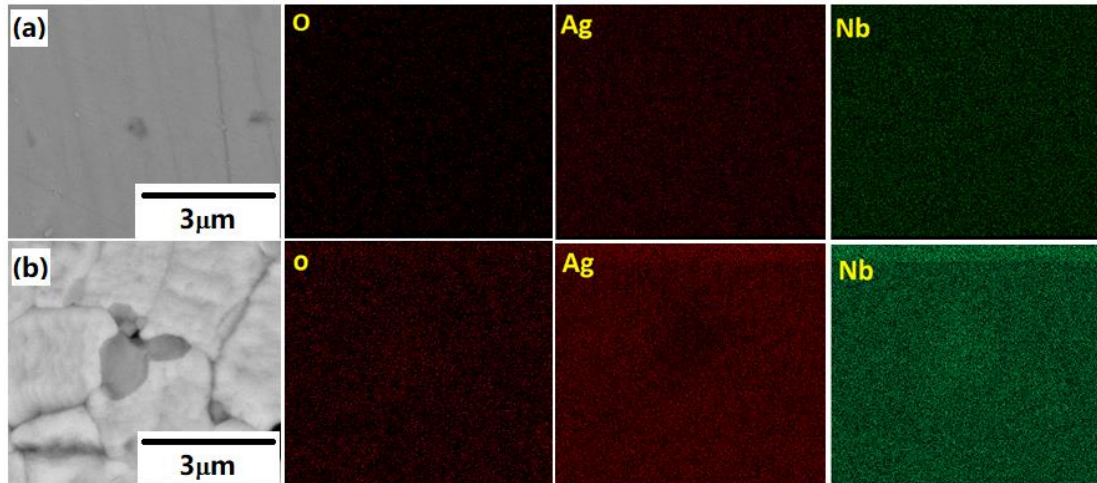

Fig.S2 SEM image (backscatter electron) and elements mapping of (a) polished ceramic surface (b) etched ceramic surface

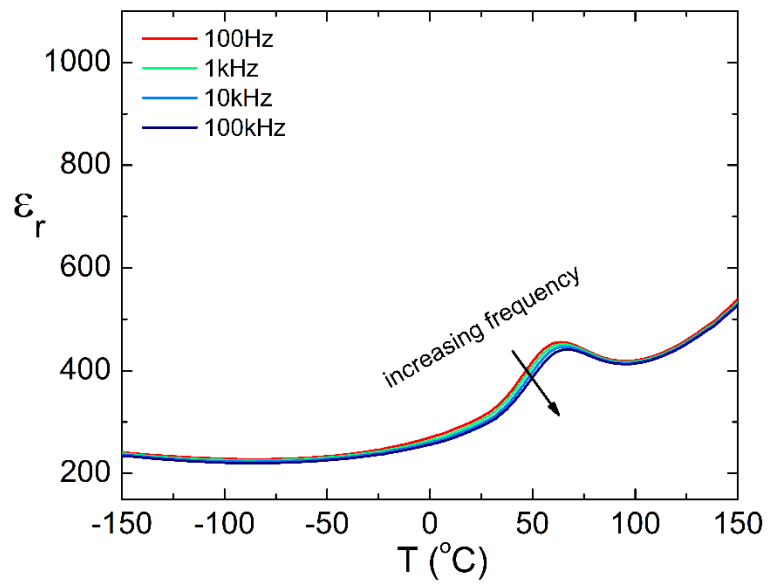

Fig.S3 Temperature-dependent relative dielectric permittivity measured from -150 to 150 $^{\circ}\text{C}$ .

Table SI Refinement parameters of AgNbO<sub>3</sub> ceramic at 25°C using non-polar *Pbcm* and polar *Pb2<sub>1</sub>m* space groups, respectively.

|                                         |                                      |                                      |
|-----------------------------------------|--------------------------------------|--------------------------------------|
| Chemical formula                        | AgNbO <sub>3</sub>                   |                                      |
| Formula weight                          | 266.38                               |                                      |
| Crystal system                          | Orthorhombic                         |                                      |
| Space group                             | <i>Pbcm</i>                          | <i>Pb2<sub>1</sub>m</i>              |
| Unit cell dimensions(Å)                 | <i>a</i> = 5.55745(8)                | <i>a</i> = 5.54782(2)                |
|                                         | <i>b</i> = 5.61546(2)                | <i>b</i> = 5.60583(4)                |
|                                         | <i>c</i> = 15.68707(4)               | <i>c</i> = 15.66004(6)               |
| volume(Å <sup>3</sup> )                 | 489.557                              | 487.030                              |
| Z                                       | 8                                    | 8                                    |
| Density(calculated)(g/cm <sup>3</sup> ) | 6.750                                | 6.786                                |
| R-factors                               | R <sub>wp</sub> = 0.0929             | R <sub>wp</sub> = 0.0916             |
|                                         | R <sub>p</sub> = 0.0652              | R <sub>p</sub> = 0.0645              |
|                                         | R <sub>exp</sub> = 0.0537            | R <sub>exp</sub> = 0.0537            |
|                                         | R <sub>F</sub> <sup>2</sup> = 0.0795 | R <sub>F</sub> <sup>2</sup> = 0.0758 |
| Total No. of variables                  | 42                                   | 58                                   |
| No. of profile points used              | 4231                                 | 4231                                 |
